# Supplementary material
Source: PubMed Central journal article supplement (PMC3754693)
Supplement: AEM.00856-13_zam999104590so1.pdf [file AEM.00856-13_zam999104590so1.pdf]

- 1 S1: ESBL genes of investigated (PCR and sequencing) *E. coli* isolates obtained from either single
- 2 animal samples or samples of animals' environment out of seven German broiler fattening farms

| farm no.                 | sampling date            | ESBL-gene                | ESBL origin                                   |                        |
|--------------------------|--------------------------|--------------------------|-----------------------------------------------|------------------------|
| 1                        | 1 <sup>st</sup> sampling | CMY & TEM-1              | cloaca swab; faeces; boot swab; litter        |                        |
|                          |                          | single CTX-M             | dust                                          |                        |
|                          | 2 <sup>nd</sup> sampling | CMY & TEM-1              | cloaca swab; faeces; boot swab; litter        |                        |
|                          |                          | single CMY               | cloaca swab; dust                             |                        |
|                          | 3 <sup>rd</sup> sampling | CMY & TEM-1              | cloaca swab; dust                             |                        |
|                          |                          | single CMY               | cloaca swab; faeces                           |                        |
|                          |                          | single TEM-1             | cloaca swab; boot swab; litter                |                        |
|                          | 2                        | 1 <sup>st</sup> sampling | CMY & TEM-1                                   | cloaca swab            |
|                          |                          |                          | single CMY                                    | faeces; dust           |
| 2 <sup>nd</sup> sampling |                          | CMY & TEM-1              | cloaca swab                                   |                        |
|                          |                          | single TEM-1             | cloaca swab; faeces; litter; boot swab; dust  |                        |
| 3 <sup>rd</sup> sampling |                          | CMY & TEM-1              | cloaca swab                                   |                        |
|                          |                          | single CMY               | cloaca swab                                   |                        |
|                          |                          | single TEM-1             | cloaca swab; faeces; litter                   |                        |
|                          |                          | single CTX-M             | cloaca swab                                   |                        |
| 3                        |                          | 1 <sup>st</sup> sampling | single SHV-12                                 | cloaca swab; boot swab |
|                          | CMY & TEM-1              |                          | cloaca swab                                   |                        |
|                          | single TEM-52            |                          | cloaca swab                                   |                        |
|                          | SHV-12 & TEM-1           |                          | cloaca swab                                   |                        |
|                          | single CMY               |                          | litter; dust                                  |                        |
|                          | 2 <sup>nd</sup> sampling | single TEM-1             | faeces                                        |                        |
|                          |                          | single CTX-M             | dust; boot swab                               |                        |
|                          |                          | single SHV-12            | cloaca swab                                   |                        |
|                          |                          | CMY & TEM-1              | cloaca swab                                   |                        |
|                          | 3 <sup>rd</sup> sampling | single TEM-52            | cloaca swab; dust; faeces; environmental swab |                        |
|                          |                          | single SHV-12            | cloaca swab; faeces; environmental swab       |                        |
|                          |                          | CMY & TEM-1              | cloaca swab                                   |                        |
|                          |                          | single TEM-1             | cloaca swab                                   |                        |
|                          |                          | single CTX-M             | cloaca swab                                   |                        |
|                          |                          | TEM-52 & SHV-12          | cloaca swab                                   |                        |
| single TEM-52            | litter; boot swab; dust  |                          |                                               |                        |
| 4                        | 1 <sup>st</sup> sampling | single CMY               | cloaca swab                                   |                        |

|          |                          |                |                                                  |
|----------|--------------------------|----------------|--------------------------------------------------|
|          |                          | single SHV-12  | cloaca swab; faeces                              |
|          |                          | single CTX-M   | cloaca swab; boot swab                           |
|          |                          | single TEM-52  | cloaca swab; litter                              |
|          | 2 <sup>nd</sup> sampling | CMY & TEM-1    | cloaca swab; environmental swab                  |
|          |                          | single SHV-12  | cloaca swab                                      |
|          |                          | single TEM-52  | cloaca swab; faeces; litter; dust; boot swab;    |
|          | 3 <sup>rd</sup> sampling | CMY & TEM-1    | environmental swab                               |
|          |                          | single TEM-52  | cloaca swab                                      |
|          |                          | single CMY     | cloaca swab; faeces; litter; boot swab           |
|          |                          | single SHV-12  | cloaca swab                                      |
|          |                          | CMY & TEM-1    | cloaca swab; environmental swab                  |
|          |                          | SHV-12 & TEM-1 | cloaca swab                                      |
|          |                          |                | cloaca swab; dust                                |
| <b>5</b> | 1 <sup>st</sup> sampling | single CMY     | cloaca swab; faeces; litter; dust; environmental |
|          |                          |                | swab                                             |
|          | 2 <sup>nd</sup> sampling | single TEM-52  | environmental swab                               |
|          |                          | CMY & TEM-1    | boot swab; environmental swab                    |
|          |                          | single TEM-1   | cloaca swab; faeces; litter                      |
|          |                          | single CTX-M   | cloaca swab                                      |
|          |                          | single CMY     | cloaca swab; boot swab                           |
|          | 3 <sup>rd</sup> sampling | single TEM-1   | cloaca swab; litter                              |
|          |                          | single TEM-52  | dust                                             |
|          |                          | CMY & TEM-1    | environmental swab                               |
| <b>6</b> | 1 <sup>st</sup> sampling | -----          | -----                                            |
|          | 2 <sup>nd</sup> sampling | single SHV-12  | cloaca swab                                      |
|          |                          | SHV-12 & CTX-M | cloaca swab                                      |
|          |                          | SHV-12 & TEM-1 | cloaca swab; dust                                |
|          |                          | CTX-M & CMY    | cloaca swab                                      |
|          |                          | single CMY     | faeces; litter; boot swab                        |
|          | 3 <sup>rd</sup> sampling | CTX-M & TEM-1  | litter                                           |
|          |                          | single SHV-12  | cloaca swab; environmental swab                  |
|          |                          | SHV-12 & CMY   | cloaca swab                                      |
|          |                          | &TEM-1         |                                                  |
|          |                          | SHV-12 & TEM-1 | cloaca swab; faeces; boot swab; environmental    |
|          |                          |                | swab                                             |

|   |                          |                |                                               |
|---|--------------------------|----------------|-----------------------------------------------|
| 7 | 1 <sup>st</sup> sampling | single SHV-12  | cloaca swab; litter                           |
|   |                          | single CMY     | cloaca swab; faeces                           |
|   |                          | SHV-12 & TEM-1 | dust; environmental swab                      |
|   | 2 <sup>nd</sup> sampling | CMY & TEM-1    | boot swab                                     |
|   |                          | single CTX-M   | cloaca swab; faeces; boot swab                |
|   | 3 <sup>rd</sup> sampling | CMY & TEM-1    | cloaca swab; litter; environmental swab       |
|   |                          | single CTX-M   | cloaca swab; faeces; dust; environmental swab |
|   |                          | single CMY     | boot swab                                     |
|   |                          |                | CMY & TEM-1                                   |
